# Supplementary material for: Prospective target assessment and multimodal prediction of survival for personalized and risk-adapted treatment strategies in multiple myeloma in the GMMG-MM5 multicenter trial
Source: Springer Nature journal article supplement (doi:10.1186/s13045-019-0750-5), 2019-06-26
Supplement: MOESM1 [file 16856760]

# OS GPI

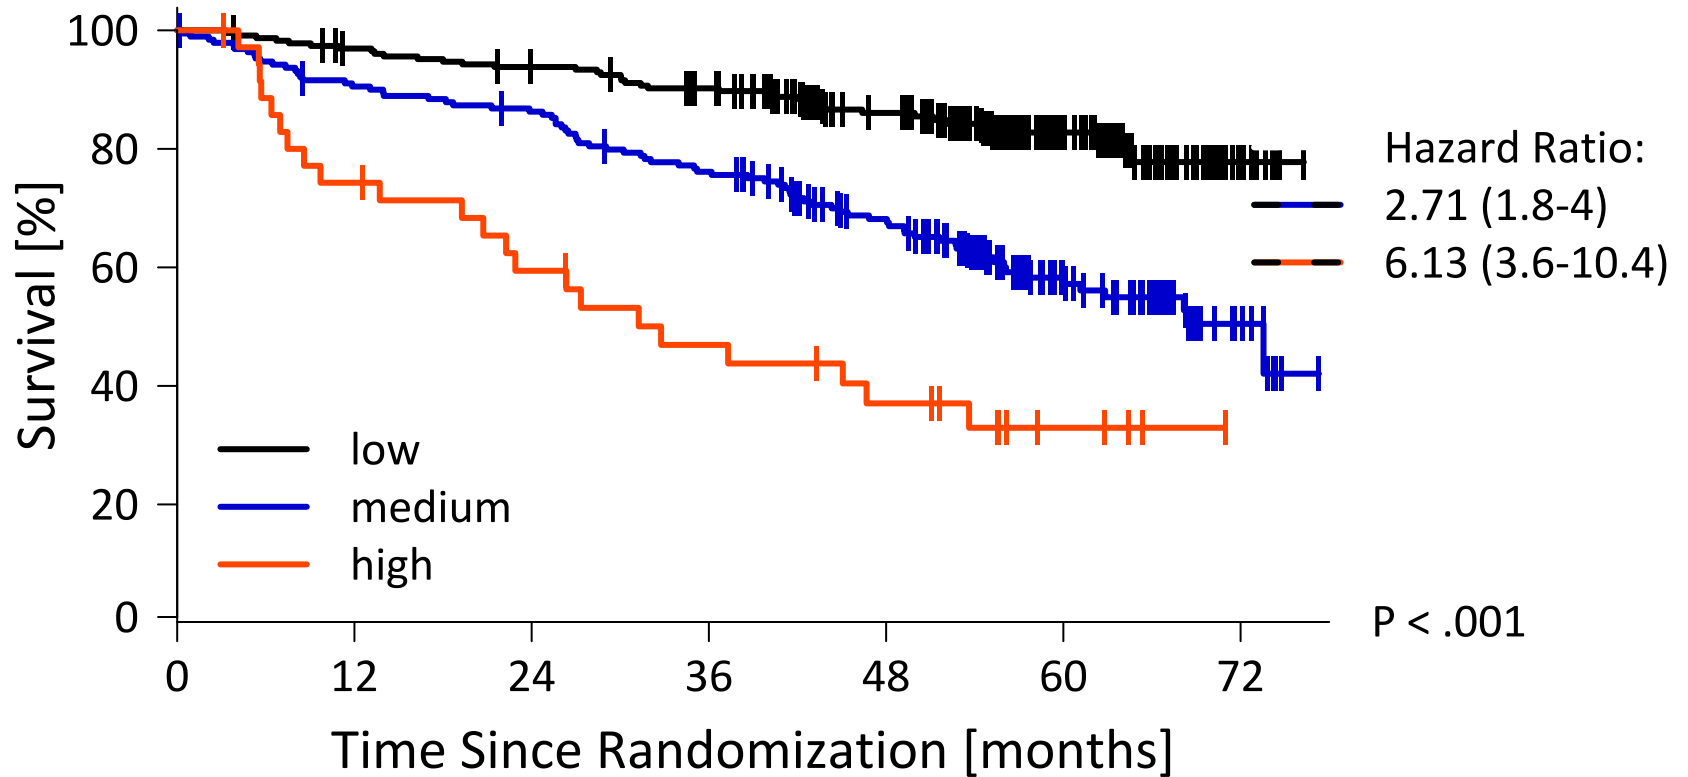

|     |     |     |     |     |    |    |        |
|-----|-----|-----|-----|-----|----|----|--------|
| 229 | 218 | 209 | 197 | 150 | 72 | 10 | low    |
| 191 | 171 | 162 | 142 | 113 | 55 | 9  | medium |
| 36  | 26  | 20  | 15  | 11  | 4  |    | high   |
